# Supplementary material for: Effects of Agaricus bisporus Mushroom Extract on Honey Bees Infected with Nosema ceranae
Source: MDPI journal article supplement (doi:10.3390/insects12100915), 2021-10-07
Supplement: s1 [file s1]

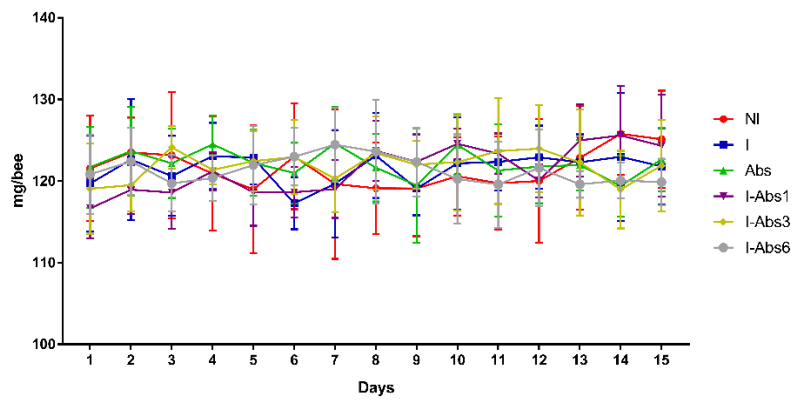

**Figure S1.** Daily food consumption per bee in the non-infected group (NI), infected group (I), and the groups infected with *N. ceranae* and treated with *A. bisporus* extract from day 1 (I-Abs1), day 3 (I-Abs3), and day 6 (I-Abs6).
